# Supplementary material for: An integrated genomics analysis of epigenetic subtypes in human breast tumors links DNA methylation patterns to chromatin states in normal mammary cells
Source: Springer Nature journal article supplement (doi:10.1186/s13058-016-0685-5), 2016-02-29
Supplement: MOESM3 [file 9781664]

**Table S2. Clinicopathological features for the seven epitypes in the discovery cohort**

|                                | <b>ET1</b> | <b>ET2</b> | <b>ET3</b> | <b>ET4</b> | <b>ET5</b> | <b>ET6</b> | <b>ET7</b> | <b>P</b>     |
|--------------------------------|------------|------------|------------|------------|------------|------------|------------|--------------|
| <b>Group size</b>              | 44         | 27         | 28         | 24         | 8          | 12         | 45         |              |
| <b>ER status</b>               |            |            |            |            |            |            |            | 1.122217e-17 |
| ER positive                    | 16         | 25         | 23         | 21         | 7          | 4          | 0          |              |
| ER negative                    | 23         | 2          | 3          | 3          | 1          | 7          | 38         |              |
| <b>PR status</b>               |            |            |            |            |            |            |            | 6.795e-15    |
| PR positive                    | 13         | 23         | 25         | 16         | 6          | 4          | 1          |              |
| PR negative                    | 25         | 4          | 1          | 7          | 2          | 7          | 36         |              |
| <b>Node status</b>             |            |            |            |            |            |            |            | 0.01836      |
| Node positive                  | 19         | 6          | 9          | 8          | 2          | 7          | 8          |              |
| Node negative                  | 16         | 21         | 14         | 7          | 5          | 3          | 25         |              |
| <b>Median tumor size (mm)</b>  | 20         | 15         | 19         | 24.5       | 25         | 25         | 25         | 0.003873     |
| <b>Histological subtypes</b>   |            |            |            |            |            |            |            | 0.1996       |
| Ductal                         | 27         | 17         | 20         | 14         | 6          | 7          | 29         |              |
| Lobular                        | 1          | 3          | 1          | 3          | 0          | 0          | 0          |              |
| Medullary                      | 0          | 1          | 0          | 0          | 0          | 0          | 2          |              |
| Other                          | 10         | 6          | 5          | 1          | 0          | 2          | 3          |              |
| <b>Median age at diagnosis</b> | 46.64      | 50.64      | 47.56      | 49.65      | 66.28      | 57.28      | 44.73      | 0.004641     |

P values were calculated using Chi-square test for ER status, PR status, node status, and histological subtypes, and Kruskal-Wallis test was used for tumor size and age at diagnosis.

**Table S3. Clinicopathological features for the seven eptypes in the validation cohort**

|                                | <b>ET1</b> | <b>ET2</b> | <b>ET3</b> | <b>ET4</b> | <b>ET5</b> | <b>ET6</b> | <b>ET7</b> | <b>P</b>     |
|--------------------------------|------------|------------|------------|------------|------------|------------|------------|--------------|
| <b>Group size</b>              | 95         | 93         | 202        | 69         | 81         | 28         | 101        |              |
| <b>ER status</b>               |            |            |            |            |            |            |            | 1.149098e-66 |
| ER positive                    | 55         | 81         | 185        | 61         | 67         | 13         | 12         |              |
| ER negative                    | 30         | 5          | 5          | 2          | 5          | 11         | 84         |              |
| <b>PR status</b>               |            |            |            |            |            |            |            | 1.397615e-54 |
| PR positive                    | 46         | 75         | 171        | 58         | 51         | 10         | 4          |              |
| PR negative                    | 38         | 11         | 18         | 5          | 21         | 14         | 91         |              |
| <b>Node status</b>             |            |            |            |            |            |            |            | 0.03273593   |
| Node positive                  | 45         | 53         | 114        | 45         | 42         | 16         | 41         |              |
| Node negative                  | 47         | 38         | 84         | 21         | 34         | 10         | 56         |              |
| <b>Tumor size</b>              |            |            |            |            |            |            |            | 0.005721     |
| T1                             | 32         | 36         | 56         | 13         | 12         | 6          | 21         |              |
| T2 or T3                       | 59         | 53         | 140        | 52         | 63         | 17         | 73         |              |
| <b>Histological subtypes</b>   |            |            |            |            |            |            |            | 5.614e-06    |
| Ductal                         | 59         | 53         | 125        | 50         | 57         | 20         | 82         |              |
| Lobular                        | 25         | 25         | 56         | 9          | 16         | 2          | 1          |              |
| Medullary                      | 2          | 0          | 0          | 0          | 0          | 0          | 3          |              |
| Other                          | 6          | 14         | 20         | 7          | 6          | 5          | 10         |              |
| <b>Median age at diagnosis</b> | 54.5       | 58.0       | 57.0       | 57.5       | 64.0       | 58.0       | 53.0       | 5.426e-05    |

P values were calculated using Chi-square test for ER status, PR status, node status, tumor size and histological subtypes, and Kruskal-Wallis test was used for age at diagnosis.
